# Supplementary material for: Iodide-reduced graphene oxide with dopant-free spiro-OMeTAD for ambient stable and high-efficiency perovskite solar cells
Source: Royal Society of Chemistry journal article supplement (doi:10.1039/c5ta02710a), 2015-01-01
Supplement: c5ta02710a1.pdf [file c5ta02710a1.pdf]

## Electronic Supplementary Information (ESI)

### **Iodide-reduced Graphene Oxide with Dopant-free Spiro-OMeTAD for Ambient Stable and High-efficiency Perovskite Solar Cells**

Qiang Luo,<sup>‡a</sup> Ye Zhang,<sup>‡a</sup> Chengyang Liu,<sup>a</sup> Jianbao Li,<sup>a, b</sup> Ning Wang<sup>\*c</sup> and Hong Lin<sup>\*a</sup>

<sup>a</sup> State Key Laboratory of New Ceramics & Fine Processing, School of Materials Science and Engineering, Tsinghua University, Beijing 100084, P.R. China. E-mail: hong-lin@tsinghua.edu.cn

<sup>b</sup> College of Materials Science and Chemical Engineering, Hainan University, Haikou 570228, P. R. China.

<sup>c</sup> State Key Laboratory of Electronic Thin Films and Integrated Devices, University of Electronic Science and Technology of China, Chengdu 610054, P. R. China. E-mail: wangninguestc@gmail.com

<sup>‡</sup> These authors contributed equally to this work.

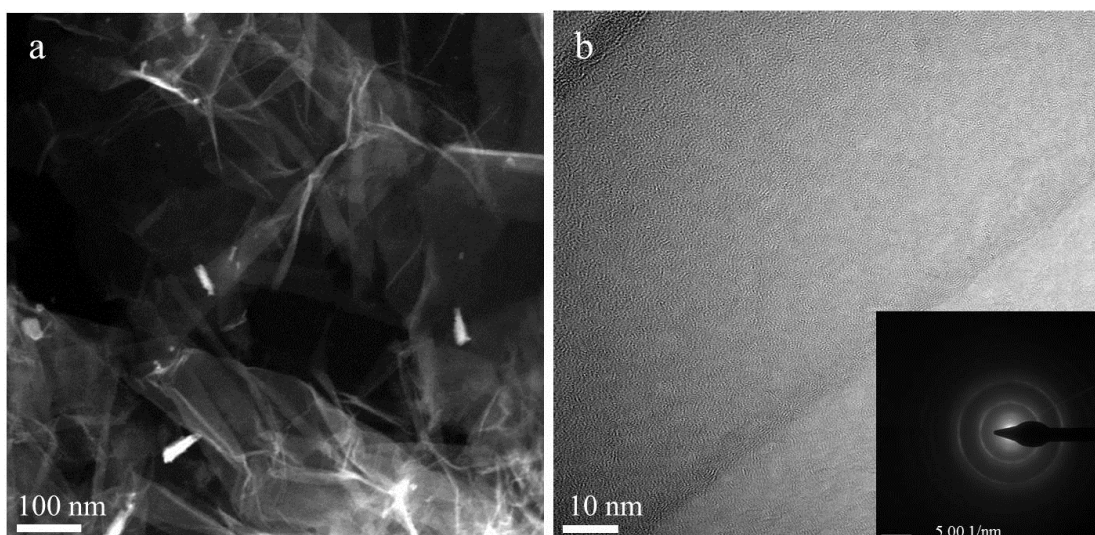

**Fig. S1** Typical TEM images of the as-synthesized RGO-1.

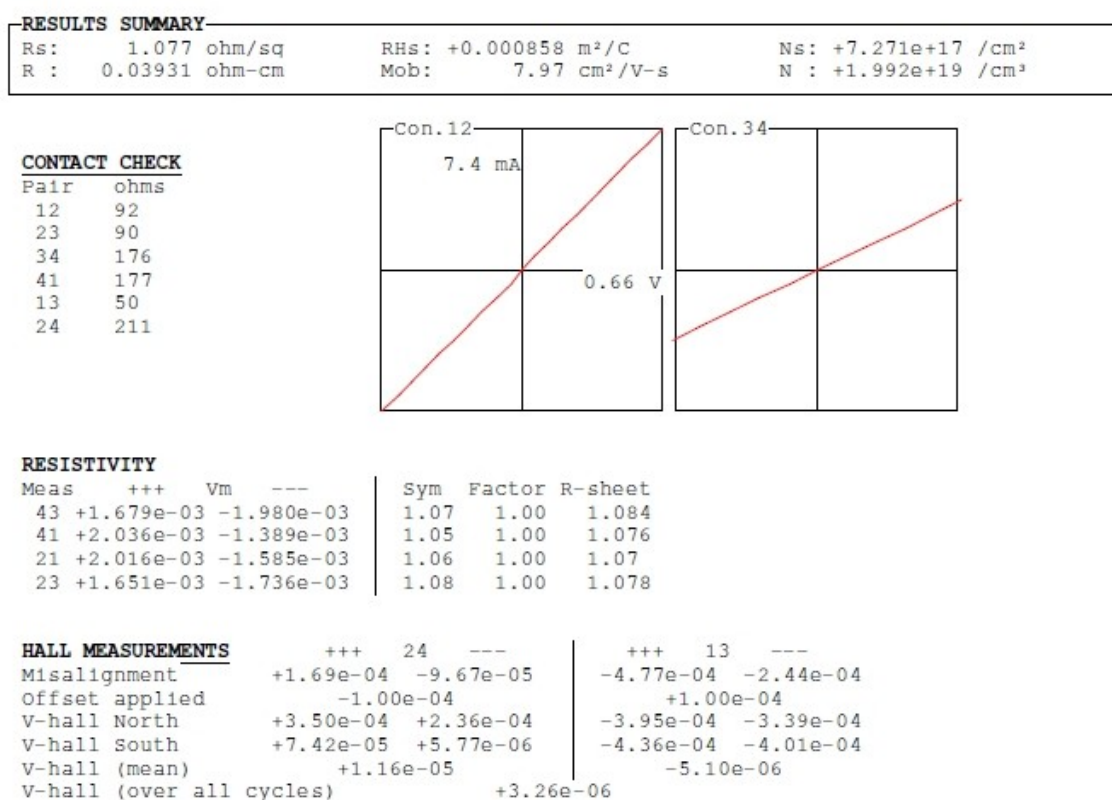

**Fig. S2** The Hall effect results of compressed-powder RGO-1 sample
